# 1 Selection and validation of reference genes for quantitative Real- 2 Time PCR in *Arabis alpina*

3 Lisa Stephan<sup>1</sup>, Vicky Tilmes<sup>2</sup>, Martin Hülskamp<sup>1,\*</sup>

4

5 <sup>1</sup> Botanical Institute, Biocenter, Cologne University, Zùlpicher Straße 47b, 50674 Cologne, Germany

6 <sup>2</sup> Department of Plant Developmental Biology, Max Planck Institute for Plant Breeding Research, Carl  
7 von Linne Weg 10, 50829 Cologne, Germany

8 \* Corresponding author ([martin.huelskamp@uni-koeln.de](mailto:martin.huelskamp@uni-koeln.de))

9

10 **Short title:** Reference qPCR primers for *Arabis alpina*

11

## 12 Abstract

13 *Arabis alpina* is a perennial arctic-alpine plant and an upcoming model organism for genetics and  
14 molecular biology for the Brassicaceae family. One essential method for most molecular approaches  
15 is the analysis of gene expression by quantitative Real-Time PCR (qPCR). For the normalisation of  
16 expression data in qPCR experiments, it is essential to use reliable reference genes that are not  
17 affected under a wide range of conditions. In this study we establish a set of 15 *A. alpina* reference  
18 genes that were tested under different conditions including cold, drought, heat, salt and gibberellic  
19 acid treatments. Data analyses with geNORM, BestKeeper and NormFinder revealed the most stable  
20 reference genes for the tested conditions: *RAN3*, *HCF* and *PSB33* are most suitable for cold  
21 treatments; *UBQ10* and *TUA5* for drought; *RAN3*, *PSB33* and *EIF4a* for heat; *CAC*, *TUA5*, *ACTIN 2* and  
22 *PSB33* for salt and *PSB33* and *TUA5* for gibberellic acid treatments. *CAC* and *ACTIN 2* showed the  
23 least variation over all tested samples. In addition, we show that two reference genes are sufficient  
24 to normalize qPCR data under our treatment conditions. In future studies, these reference genes can  
25 be used for an adequate normalisation and thus help to generate high quality qPCR data in *A. alpina*.

## 26 Introduction

27 During the last years, *A. alpina* has been established as a new model system in the Brassicaceae  
28 family (1,2). It is native to mountains and arctic-alpine habitats (3,4) and combines several features  
29 enabling genetic and molecular studies: it is diploid, self-fertile, has a small and sequenced genome  
30 and can be transformed with *Agrobacterium tumefaciens* (1). *A. alpina* has an evolutionary distance  
31 to *A. thaliana* of about 26 to 40 million years (4,5). This facilitates functional comparisons of  
32 biological processes, as orthologous genes can be identified by sequence similarity and synteny (6).

33 Most molecular studies require quantitative analyses of the expression of genes of interest by  
34 quantitative Real-Time PCR. For proper comparisons of expression levels, the expression data of the  
35 genes under study are normalized using genes as a reference that show no or very little variation  
36 under different conditions. In 2009, the Minimum Information for Publication of Quantitative Real-  
37 Time PCR Experiments (MIQE) guidelines were published, with the aim to provide a consensus on  
38 correct performance and interpretation of qPCR experiments (Bustin et al., 2009). These guidelines  
39 should ensure that the normalisation enables the comparison of transcripts in different samples by  
40 correcting variations in yields of extraction and reverse transcription and the efficiency of  
41 amplification. A pre-requisite for any qPCR analysis are suitable primer sets for reference genes that  
42 are thoroughly tested. These need to fulfil various requirements: primers should create a specific  
43 amplicon of 80 to 200 bp, without creating primer dimers. The amplification should be carried out  
44 with close to 100 % efficiency and show a linear standard curve with a correlation of more than 0.99.  
45 In general, there should be minimal variation between replicates, indicating consistent performance  
46 of the primers.

47 In this study we established primer pairs for 15 reference genes that can be used for future qPCR  
48 studies in *A. alpina*: *ADENOSINE TRIPHOSPHATASE (ATPase)*, *THIOREDOXIN*, *HIGH CHLOROPHYLL*  
49 *FLUORESCENCE 164 (HCF)*, *EUKARYOTIC TRANSLATION INITIATION FACTOR 4A1 (EIF4a)*, *RAN GTPASE*  
50 *3 (RAN3)*, *UBIQUITIN 10 (UBQ10)*, *ACTIN 2*, *PHOTOSYSTEM B PROTEIN 33 (PSB33)*, *HISTONE H3*,

51 *NAD(P)H PLASTOQUINONE DEHYDROGENASE COMPLEX SUBUNIT O (NdhO)*, *TUBULIN ALPHA 5*  
52 *(TUA5)*, *18s RIBOSOMAL RNA (18srRNA)*, *CLATHRIN ADAPTOR COMPLEX MEDIUM SUBUNIT (CAC)*,  
53 *SAND family protein (SAND)* and *HEAT SHOCK PROTEIN 81.2/90 (HSP81.2/90)*. The primers were  
54 thoroughly tested, and reference genes were evaluated for variations in their expression under  
55 different conditions including cold, drought, heat and salt in whole seedlings and gibberellic acid (GA)  
56 treatments in leaves. Using genes specifically responding to the different treatment, we demonstrate  
57 the impact of normalization with our reference genes.

## 58 Results

### 59 Selection and validation of reference genes

60 To compile a set of suitable reference genes, we pursued three approaches: first, we selected *A.*  
61 *thaliana* genes that are known to show little variation under different conditions. Corresponding  
62 orthologs in *A. alpina* were then identified by sequence similarity and synteny. Second, we identified  
63 genes which show stable expression in *A. alpina* over an extended period of time. Third, we included  
64 a well-established reference gene from *A. alpina* from former studies. Thus, we created a set of 15  
65 reference genes (Table 1), including nine orthologs to *A. thaliana* reference genes, five novel  
66 reference genes and *RAN3*, a known reference gene for qPCR in *A. alpina* (1). In a first step, we  
67 amplified the gene fragments and verified the amplicon by sequencing. In addition, we analysed the  
68 melting curves to exclude unspecific products and/or primer dimers (Fig S1).

69 **Table 1. Candidate reference genes, primers and amplicons.**

| Name        | Gene ID    | Arabidopsis homolog | Primer sequence (5' to 3')                            | Amplicon length [bp] |
|-------------|------------|---------------------|-------------------------------------------------------|----------------------|
| ATPase      | Aa_G9730   | AT2G25610           | F GCCAACCTTGATGCGGGTTA<br>R GTTGGCCATGTTGCTTGTC       | 176 **               |
| THIOREDOXIN | Aa_G337160 | AT5G03880           | F GATTGGTCGTGCCGAAAGG<br>R TCTCGAGCAATTCCTGTCGTTTG    | 188 **               |
| HCF         | Aa_G363210 | AT4G37200           | F AAGGTAATGTTGTCGGGAGGCT<br>R CGGCTCGGGCATGAGGAAT     | 96                   |
| EIF4a       | Aa_G472320 | AT3G13920           | F CCAGCTTCTCCCACCAAGA<br>R GCTCGTCACGCTTACCAAG        | 122                  |
| RAN3        | Aa_G442020 | AT5G55190           | F CACAGGAAAAACACATTCGT<br>R CCATCCCTAAGACCACCAAAT     | 174 **               |
| UBQ10       | Aa_G41880  | AT4G05320           | F CGTCTCCGTGGTGGTTTCTA<br>R AAGGCCCAAAACACAAACG       | 122                  |
| ACTIN 2     | NA         | AT3G18780           | F AGCTGTTCTCCCTGTACG<br>R AACCTCGTAGATTGGCACA         | 94 *                 |
| PSB33       | Aa_G319470 | AT1G71500           | F TGGCGACCACTGCATCTTCA<br>R ATCGACGGTCACGACGGAGA      | 117                  |
| HISTONE H3  | NA         | AT5G65360           | F CTCACGGAGAGCGACGGTTC<br>R GCAACTCGCGACGAAAGCAG      | 97                   |
| NdhO        | Aa_G477070 | AT1G74880           | F GCGGCGAGGTCTTGACATT<br>R TCGCTCGTAAACAAGTTTCTCAGACT | 134                  |
| TUA5        | NA         | AT5G19780           | F TGTGACCCGAGGCACGGAAA<br>R CCAGTAGGGCACCAGTCAACA     | 137**                |
| 18srRNA     | NA         | AT3G41768           | F CTCCGATCCCGAAGGCCAAC<br>R CCTTAAGTGGCCGGGTCGTG      | 141                  |
| CAC         | Aa_G26240  | AT5G46630           | F TGGACAAGACCACCAATCCA<br>R CACTCGACCGTGTGTAACC       | 113 *                |
| SAND        | Aa_G18160  | AT2G28390           | F TTGCAGGATTCGCATTGAGG<br>R TCCAAGGGACCTCCTGTTC       | 178 **               |
| HSP81.2/90  | NA         | AT5G56030           | F CGTCTGGTGAGGCTCTTGGT<br>R AGCCTACGCTCCTCAAGGTACT    | 85                   |

NA – not annotated (identified by nucleotide BLAST), F – forward primer, R – reverse primer, bp – base pair, \* amplicon contains an intron on genomic level, \*\*amplicon contains an intron on genomic level and at least one primer is spanning an exon-intron junction.

70 Second, we determined the primer efficiencies and correlation coefficients to demonstrate the  
71 quality of the primer pairs (Table 2, Fig S2). All reference gene primers displayed an efficiency  
72 between 96.42 and 107.01 % and a correlation higher than 0.99.

73

74 **Table 2. Primer efficiencies and correlation of reference gene candidates.**

| Gene        | Efficiency [%] | R <sup>2</sup> |
|-------------|----------------|----------------|
| ATPase      | 98.33          | -0.996         |
| THIOREDOXIN | 101.92         | -0.992         |
| HCF         | 99.98          | -0.997         |
| EIF4a       | 107.01         | -0.992         |
| RAN3        | 102.30         | -0.998         |
| UBQ10       | 102.52         | -0.999         |
| ACTIN 2     | 102.85         | -0.999         |
| PSB33       | 99.51          | -1.000         |
| HISTONE H3  | 99.14          | -0.999         |
| NdhO        | 94.34          | -0.999         |
| TUA5        | 98.32          | -1.000         |
| 18srRNA     | 98.65          | -1.000         |
| CAC         | 98.07          | -0.999         |
| SAND        | 96.42          | -0.999         |
| HSP81.2/90  | 96.74          | -0.999         |

Efficiency [%] – efficiency of the primers was calculated with  $E[\%] = 100 \times (10^{\left(-\frac{1}{slope}\right)} - 1)$ , slope – average Cq values (y) and log10 values of six serial dilutions (x) were used to calculate the slope of a regression line with the formula  $slope = \frac{\sum(x - \bar{x})(y - \bar{y})}{\sum(x - \bar{x})^2}$ , R<sup>2</sup> – correlation of the Cq values calculated with the formula  $\rho_{x,y} = \frac{Cov(X,Y)}{\sigma_x \times \sigma_y}$ .

75

## 76 Expression stability of reference genes after treatments

77 The expression levels of the reference genes were detected as cycle quantification (Cq) values. The  
 78 mean Cq values over all treatments ranged between 15.10 (*18srRNA*) and 26.68 (*SAND*). The  
 79 *18srRNA*, *UBQ10* and *ACTIN 2* genes showed the highest expression/lowest Cq (Fig 1). Overall, Cq  
 80 values for a single reference gene varied 4.30 on average, with a minimum variation of 2.82 (*UBQ10*)  
 81 and a maximum variation of 8.12 (*HSP81.2/90*).

82 **Fig 1. qPCR Cq values of candidate reference genes in all treatments.** The box includes all data points between  
 83 the 25 % quantile and the 75 % quantile. The whiskers span all values below and above, excluding outliers  
 84 which are displayed as dots. The median, which marks the 50 % quantile, is displayed as a line.

85 To determine to what extent the selected reference genes respond to different stimuli, we analysed  
86 their expression in cold, drought, heat, salt and gibberellic acid treatments. The stability was  
87 calculated using three common statistical algorithms: NormFinder (7), BestKeeper (8) and geNorm  
88 (9). These algorithms can be used to rank reference genes of a given set by their stability and  
89 determine the most stable genes for the tested conditions. In addition, geNorm provides a cut off  
90 value of 1.5, above which primer pairs are considered adequate for normalisation. All genes in all  
91 treatments, except for *HSP81.2/90* under heat stress conditions, met this criterion. Thus, all  
92 reference genes reported here can be considered suitable for a wide range of conditions. The most  
93 stable genes for cold treatments were *RAN3*, *HCF* and *PSB33*. According to the BestKeeper algorithm,  
94 *EIF4a* could be considered as a reference for cold treatments as well. However, especially geNorm  
95 advises against this gene, ranking it at position eight. After drought treatment, *UBQ10* and *TUA5*  
96 showed the least overall variation in the three methods. Here in particular, the results strongly  
97 differed between the algorithms. While *HISTONE H3* ranked first for BestKeeper, it was found to be  
98 least stable in the other two methods. On the contrary, *EIF4a* and *THIOREDOXIN* showed high  
99 stability in NormFinder and geNorm, but low values in BestKeeper. Under heat conditions, *RAN3*,  
100 *PSB33* and *EIF4a* were most stable over all algorithms and under salt conditions *CAC*, *TUA5*, *ACTIN 2*  
101 and *PSB33* performed best. Finally, the GA treatments caused least changes of the expression of  
102 *PSB33* and *TUA5*, while *THIOREDOXIN* showed stable expression only for NormFinder and geNorm.  
103 When taking all stress treatments into account, *THIOREDOXIN* and *CAC* showed the least variation.  
104 When considering all treatments, *CAC* and *ACTIN 2* showed the most stable expression (Table S2).

105

106 **Table 3. Ranking of gene expression stability under stress conditions and hormone stimuli.** Genes were  
 107 ranked using the three commonly used statistical algorithms NormFinder, BestKeeper and geNorm. The  
 108 stability value describes the variance (NormFinder and geNorm) or standard deviation (BestKeeper).

|                | Rank | NormFinder         |           | BestKeeper         |           | geNorm             |           |
|----------------|------|--------------------|-----------|--------------------|-----------|--------------------|-----------|
|                |      | Gene               | Stability | Gene               | Stability | Gene               | Stability |
| <b>Cold</b>    | 1    | <i>HCF</i>         | 0.04      | <i>RAN3</i>        | 1.11      | <i>PSB33</i>       | 0.28      |
|                | 2    | <i>RAN3</i>        | 0.06      | <i>EIF4a</i>       | 1.13      | <i>RAN3</i>        | 0.28      |
|                | 3    | <i>PSB33</i>       | 0.07      | <i>HCF</i>         | 1.14      | <i>HCF</i>         | 0.29      |
|                | 4    | <i>EIF4a</i>       | 0.10      | <i>NdhO</i>        | 1.16      | <i>TUA5</i>        | 0.30      |
|                | 5    | <i>ATPase</i>      | 0.11      | <i>UBQ10</i>       | 1.17      | <i>ATPase</i>      | 0.31      |
|                | 6    | <i>TUA5</i>        | 0.12      | <i>TUA5</i>        | 1.18      | <i>THIOREDOXIN</i> | 0.31      |
|                | 7    | <i>THIOREDOXIN</i> | 0.14      | <i>HISTONE H3</i>  | 1.18      | <i>CAC</i>         | 0.31      |
|                | 8    | <i>NdhO</i>        | 0.15      | <i>PSB33</i>       | 1.18      | <i>EIF4a</i>       | 0.32      |
|                | 9    | <i>HISTONE H3</i>  | 0.15      | <i>SAND</i>        | 1.19      | <i>SAND</i>        | 0.33      |
|                | 10   | <i>CAC</i>         | 0.15      | <i>THIOREDOXIN</i> | 1.21      | <i>NdhO</i>        | 0.35      |
|                | 11   | <i>SAND</i>        | 0.15      | <i>ATPase</i>      | 1.21      | <i>HISTONE H3</i>  | 0.36      |
|                | 12   | <i>UBQ10</i>       | 0.17      | <i>CAC</i>         | 1.23      | <i>ACTIN 2</i>     | 0.37      |
|                | 13   | <i>ACTIN 2</i>     | 0.22      | <i>ACTIN 2</i>     | 1.26      | <i>UBQ10</i>       | 0.38      |
|                | 14   | <i>18srRNA</i>     | 0.28      | <i>18srRNA</i>     | 1.34      | <i>18srRNA</i>     | 0.45      |
|                | 15   | <i>HSP81.2/90</i>  | 0.63      | <i>HSP81.2/90</i>  | 1.75      | <i>HSP81.2/90</i>  | 0.92      |
| <b>Drought</b> | 1    | <i>UBQ10</i>       | 0.05      | <i>HISTONE H3</i>  | 1.11      | <i>UBQ10</i>       | 0.19      |
|                | 2    | <i>EIF4a</i>       | 0.07      | <i>TUA5</i>        | 1.14      | <i>EIF4a</i>       | 0.20      |
|                | 3    | <i>THIOREDOXIN</i> | 0.08      | <i>NdhO</i>        | 1.18      | <i>THIOREDOXIN</i> | 0.21      |
|                | 4    | <i>CAC</i>         | 0.08      | <i>HCF</i>         | 1.20      | <i>CAC</i>         | 0.21      |
|                | 5    | <i>TUA5</i>        | 0.08      | <i>UBQ10</i>       | 1.20      | <i>TUA5</i>        | 0.22      |
|                | 6    | <i>SAND</i>        | 0.09      | <i>SAND</i>        | 1.22      | <i>ATPase</i>      | 0.22      |
|                | 7    | <i>ATPase</i>      | 0.10      | <i>CAC</i>         | 1.22      | <i>HCF</i>         | 0.22      |
|                | 8    | <i>HCF</i>         | 0.10      | <i>HSP81.2/90</i>  | 1.22      | <i>SAND</i>        | 0.22      |
|                | 9    | <i>NdhO</i>        | 0.10      | <i>THIOREDOXIN</i> | 1.23      | <i>NdhO</i>        | 0.23      |
|                | 10   | <i>ACTIN 2</i>     | 0.12      | <i>ATPase</i>      | 1.24      | <i>ACTIN 2</i>     | 0.24      |
|                | 11   | <i>RAN3</i>        | 0.12      | <i>18srRNA</i>     | 1.24      | <i>RAN3</i>        | 0.24      |
|                | 12   | <i>PSB33</i>       | 0.15      | <i>EIF4a</i>       | 1.25      | <i>PSB33</i>       | 0.26      |
|                | 13   | <i>18srRNA</i>     | 0.17      | <i>ACTIN 2</i>     | 1.27      | <i>18srRNA</i>     | 0.30      |
|                | 14   | <i>HSP81.2/90</i>  | 0.19      | <i>RAN3</i>        | 1.30      | <i>HSP81.2/90</i>  | 0.32      |
|                | 15   | <i>HISTONE H3</i>  | 0.25      | <i>PSB33</i>       | 1.30      | <i>HISTONE H3</i>  | 0.39      |
| <b>Heat</b>    | 1    | <i>EIF4a</i>       | 0.04      | <i>RAN3</i>        | 1.09      | <i>EIF4a</i>       | 0.47      |
|                | 2    | <i>RAN3</i>        | 0.04      | <i>EIF4a</i>       | 1.12      | <i>ATPase</i>      | 0.48      |
|                | 3    | <i>PSB33</i>       | 0.04      | <i>PSB33</i>       | 1.14      | <i>RAN3</i>        | 0.48      |
|                | 4    | <i>HCF</i>         | 0.04      | <i>HCF</i>         | 1.15      | <i>THIOREDOXIN</i> | 0.48      |
|                | 5    | <i>THIOREDOXIN</i> | 0.08      | <i>THIOREDOXIN</i> | 1.18      | <i>HISTONE H3</i>  | 0.50      |
|                | 6    | <i>ATPase</i>      | 0.09      | <i>ATPase</i>      | 1.20      | <i>PSB33</i>       | 0.51      |



| Rank        | NormFinder        |                    | BestKeeper        |                    | geNorm            |                    |      |
|-------------|-------------------|--------------------|-------------------|--------------------|-------------------|--------------------|------|
|             | Gene              | Stability          | Gene              | Stability          | Gene              | Stability          |      |
| 7           | <i>NdhO</i>       | 0.12               | <i>NdhO</i>       | 1.20               | <i>HCF</i>        | 0.52               |      |
| 8           | <i>HISTONE H3</i> | 0.18               | <i>HISTONE H3</i> | 1.22               | <i>ACTIN 2</i>    | 0.52               |      |
| 9           | <i>18srRNA</i>    | 0.22               | <i>ACTIN 2</i>    | 1.28               | <i>NdhO</i>       | 0.55               |      |
| 10          | <i>ACTIN 2</i>    | 0.24               | <i>18srRNA</i>    | 1.28               | <i>CAC</i>        | 0.58               |      |
| 11          | <i>CAC</i>        | 0.32               | <i>CAC</i>        | 1.37               | <i>TUA5</i>       | 0.60               |      |
| 12          | <i>TUA5</i>       | 0.35               | <i>TUA5</i>       | 1.39               | <i>18srRNA</i>    | 0.61               |      |
| 13          | <i>UBQ10</i>      | 0.40               | <i>UBQ10</i>      | 1.47               | <i>SAND</i>       | 0.76               |      |
| 14          | <i>SAND</i>       | 0.49               | <i>SAND</i>       | 1.61               | <i>UBQ10</i>      | 0.87               |      |
| 15          | <i>HSP81.2/90</i> | 1.74               | <i>HSP81.2/90</i> | 5.22               | <i>HSP81.2/90</i> | 2.52               |      |
| <b>Salt</b> | 1                 | <i>CAC</i>         | 0.11              | <i>TUA5</i>        | 1.16              | <i>CAC</i>         | 0.55 |
|             | 2                 | <i>THIOREDOXIN</i> | 0.12              | <i>CAC</i>         | 1.18              | <i>PSB33</i>       | 0.57 |
|             | 3                 | <i>ACTIN 2</i>     | 0.15              | <i>18srRNA</i>     | 1.19              | <i>ACTIN 2</i>     | 0.57 |
|             | 4                 | <i>PSB33</i>       | 0.15              | <i>ACTIN 2</i>     | 1.19              | <i>TUA5</i>        | 0.57 |
|             | 5                 | <i>TUA5</i>        | 0.17              | <i>PSB33</i>       | 1.22              | <i>THIOREDOXIN</i> | 0.57 |
|             | 6                 | <i>NdhO</i>        | 0.19              | <i>SAND</i>        | 1.24              | <i>HISTONE H3</i>  | 0.62 |
|             | 7                 | <i>HISTONE H3</i>  | 0.22              | <i>THIOREDOXIN</i> | 1.24              | <i>NdhO</i>        | 0.63 |
|             | 8                 | <i>SAND</i>        | 0.27              | <i>NdhO</i>        | 1.25              | <i>UBQ10</i>       | 0.64 |
|             | 9                 | <i>UBQ10</i>       | 0.29              | <i>HISTONE H3</i>  | 1.25              | <i>SAND</i>        | 0.66 |
|             | 10                | <i>HCF</i>         | 0.37              | <i>UBQ10</i>       | 1.34              | <i>18srRNA</i>     | 0.71 |
|             | 11                | <i>18srRNA</i>     | 0.37              | <i>HCF</i>         | 1.4               | <i>HCF</i>         | 0.73 |
|             | 12                | <i>ATPase</i>      | 0.41              | <i>ATPase</i>      | 1.59              | <i>ATPase</i>      | 0.83 |
|             | 13                | <i>HSP81.2/90</i>  | 0.69              | <i>HSP81.2/90</i>  | 1.93              | <i>HSP81.2/90</i>  | 1.08 |
|             | 14                | <i>EIF4a</i>       | 0.75              | <i>EIF4a</i>       | 1.95              | <i>EIF4a</i>       | 1.18 |
|             | 15                | <i>RAN3</i>        | 0.93              | <i>RAN3</i>        | 2.43              | <i>RAN3</i>        | 1.4  |
| <b>GA</b>   | 1                 | <i>TUA5</i>        | 0.05              | <i>SAND</i>        | 1.15              | <i>TUA5</i>        | 0.21 |
|             | 2                 | <i>THIOREDOXIN</i> | 0.06              | <i>RAN3</i>        | 1.15              | <i>PSB33</i>       | 0.22 |
|             | 3                 | <i>CAC</i>         | 0.07              | <i>PSB33</i>       | 1.15              | <i>THIOREDOXIN</i> | 0.22 |
|             | 4                 | <i>PSB33</i>       | 0.08              | <i>TUA5</i>        | 1.16              | <i>CAC</i>         | 0.22 |
|             | 5                 | <i>NdhO</i>        | 0.09              | <i>EIF4a</i>       | 1.17              | <i>ACTIN 2</i>     | 0.23 |
|             | 6                 | <i>ACTIN 2</i>     | 0.09              | <i>CAC</i>         | 1.17              | <i>NdhO</i>        | 0.23 |
|             | 7                 | <i>HCF</i>         | 0.09              | <i>ACTIN 2</i>     | 1.18              | <i>HCF</i>         | 0.24 |
|             | 8                 | <i>RAN3</i>        | 0.11              | <i>HCF</i>         | 1.18              | <i>RAN3</i>        | 0.24 |
|             | 9                 | <i>EIF4a</i>       | 0.12              | <i>THIOREDOXIN</i> | 1.19              | <i>EIF4a</i>       | 0.25 |
|             | 10                | <i>SAND</i>        | 0.13              | <i>NdhO</i>        | 1.20              | <i>SAND</i>        | 0.26 |
|             | 11                | <i>ATPase</i>      | 0.13              | <i>ATPase</i>      | 1.22              | <i>ATPase</i>      | 0.27 |
|             | 12                | <i>UBQ10</i>       | 0.15              | <i>HISTONE H3</i>  | 1.28              | <i>UBQ10</i>       | 0.29 |
|             | 13                | <i>HSP81.2/90</i>  | 0.16              | <i>UBQ10</i>       | 1.32              | <i>HSP81.2/90</i>  | 0.30 |
|             | 14                | <i>HISTONE H3</i>  | 0.20              | <i>HSP81.2/90</i>  | 1.34              | <i>HISTONE H3</i>  | 0.34 |
|             | 15                | <i>18srRNA</i>     | 0.35              | <i>18srRNA</i>     | 1.37              | <i>18srRNA</i>     | 0.53 |

## 110 Optimal number of reference genes

111 For the optimal normalisation, it is necessary to use two or more reference genes in each  
112 experiment. The optimal number of reference genes can be determined with the geNorm algorithm,  
113 which calculates the pairwise variation  $V_{n/n+1}$  based on the normalisation factors  $NF_n$  and  $NF_{n+1}$ , with  
114  $n \geq 2$ . If  $V_{n/n+1}$  is below 0.15,  $n$  is the optimal number of reference genes. For all tested treatments,  
115 individually or combined, two reference genes are sufficient to normalise qPCR measurements (Fig  
116 2). The use of a third reference would not improve the results significantly.

117 **Fig 2. Optimal number of reference genes for various conditions.** The geNorm algorithm was used to  
118 determine the pairwise variation ( $V$ ) between the reference genes for treatments with cold, drought, heat, salt  
119 and gibberellic acid. The threshold for adequate normalisation is  $V \leq 0.15$ , indicated by the green dashed line.

## 120 Impact of reference genes on the normalisation of samples in abiotic 121 stress and hormone treatments

122 The efficiencies of treatments with cold, drought, heat, salt and gibberellic acid were controlled by  
123 the expression analysis of specific stress response genes by qPCR using primers for *RD29A*  
124 (*RESPONSIVE TO DESICCATION 29A*, cold and drought responsive), *HSP81.2/90* (heat responsive),  
125 *TSPO* (*OUTER MEMBRANE TRYPTOPHAN-RICH SENSORY PROTEIN-RELATED*, salt responsive) and  
126 *GA3ox1* (*GIBBERELLIN 3-OXIDASE 1*, GA responsive). All primers showed efficiencies of 80.28 to  
127 104.22 % and correlations of more than 0.99 (Table 4).

128

129 **Table 4. Abiotic stress and hormone responsive genes, primers and amplicons.**

| Name           | Gene ID        | Arabidops<br>is<br>homolog | Primer sequence (5' to 3') | Amplico<br>n<br>length<br>[bp] | E [%] | R <sup>2</sup> |
|----------------|----------------|----------------------------|----------------------------|--------------------------------|-------|----------------|
| RD29A          | Aa_G39687<br>0 | AT5G5231<br>0              | F GCCCTTGCTTCAGGGCTAG      | 89                             | 80.28 | -              |
|                |                |                            | R G                        |                                |       |                |
| HSP81.2/9<br>0 | NA             | AT5G5603<br>0              | F TGCTCCGGTGTTCCTCACTCC    | 85                             | 96.74 | -              |
|                |                |                            | R CT                       |                                |       |                |
| TSPO           | Aa_G12840      | AT2G4777<br>0              | F GTGGACGGTGGGTTCCACA      | 125                            | 104.2 | -              |
|                |                |                            | R A                        |                                |       |                |
| GA3ox1         | Aa_G11246<br>0 | AT1G1555<br>0              | F CACACCACAAGCCCGGCTA      | 129                            | 82.79 | -              |
|                |                |                            | R A                        |                                |       |                |
|                |                |                            | F TTCCGGTTACCTGTCCAACG     |                                |       |                |
|                |                |                            | R GCCTGAGATGGTGAAGCCT      |                                |       |                |
|                |                |                            | T                          |                                |       | 9              |

NA – not annotated (identified by nucleotide BLAST), F – forward primer, R – reverse primer, E[%] – efficiency of the primers was calculated with  $E[\%] = 100 \times (10^{\left(-\frac{1}{\text{slope}}\right)} - 1)$ , slope – average Cq values (y) and log<sub>10</sub> values of six serial dilutions (x) were used to calculate the slope of a regression line with the formula  $\text{slope} = \frac{\sum(x - \bar{x})(y - \bar{y})}{\sum(x - \bar{x})^2}$ , R<sup>2</sup> – correlation of the Cq values calculated with the formula  $\rho_{x,y} = \frac{\text{Cov}(X,Y)}{\sigma_x \times \sigma_y}$ .

130

131 Normalisation of the results was carried out with one or two of the most stable reference genes

132 determined in this study (Fig 3). For cold, normalisation was carried out with *RAN3* and/or *HCF*.

133 Drought samples were normalised to *UBQ10* and/or *TUA5*. GA and salt responsive genes were

134 normalised with *PSB33* and/or *TUA5*. Finally, the heat samples were normalised with *RAN3* and/or

135 *PSB33*. The results clearly show that all treatments were successful, leading to an increased (cold,

136 drought, heat, salt) or decreased (GA) expression of the responsive genes. Individual normalisation

137 with each reference gene led to differences in the calculated fold changes of 28.9 % (cold), 7.5 %

138 (drought), 3.6 % (GA), 9.3 % (heat) and 10.4 % (salt) between reference gene 1 and 2, respectively.  
139 These results clearly show the necessity to use two reference genes simultaneously.

**Fig 3. Comparison of specific stress response genes normalised with different reference genes.**

Normalisation of the stress response genes RD29A (RESPONSIVE TO DESICCATION 29A, cold and drought responsive), HSP81.2/90 (heat responsive), TSPO (OUTER MEMBRANE TRYPTOPHAN-RICH SENSORY PROTEIN-RELATED, salt responsive) and GA3ox1 (GIBBERELLIN 3-OXIDASE 1, GA responsive) was carried out with one or two reference genes (RG1 and RG2): cold – RAN3 and HCF, drought – UBQ10 and TUA5, GA and salt – PSB33 and TUA5, heat – RAN3 and PSB33.

## 140 Material and Methods

### 141 Plant growth conditions

142 For the abiotic stress treatments, seeds were surface sterilised with increasing concentrations of  
143 ethanol and grown on MS (10) plates without additional sucrose. The seeds were stratified for five  
144 days. Subsequently, plants were grown under long day conditions (16h light/8h darkness) at  $21\pm 1^{\circ}\text{C}$   
145 and  $100\pm 20\ \mu\text{mol}/\text{m}^2\text{s}$  light intensity.

146 The heat and cold treatments were carried out by transferring 5-7 day old seedlings to  $38^{\circ}\text{C}$  and  $4^{\circ}\text{C}$ ,  
147 respectively. Samples were taken after 2 h. Drought was induced on MS plates which were exposed  
148 to liquid MS containing 20 % PEG 8000 for 24 h prior to the experiment. Samples were taken after  
149 24 h. For salt treatments, two to three 5-7 day old seedlings were transferred from plates to liquid  $\frac{1}{2}$   
150 MS (control) or liquid  $\frac{1}{2}$  MS containing 125 mM NaCl for 4 h under constant shaking.

151 For the GA treatment, plants were grown on soil under long day conditions (16h light/8h darkness) at  
152  $21\pm 1^{\circ}\text{C}$  and  $200\pm 20\ \mu\text{mol}/\text{m}^2\text{s}$  light intensity. The treatment was started right after germination and  
153 continued twice per week. Plants were sprayed with  $20\ \mu\text{M}$  GA4 (Sigma Aldrich, stock solution:  
154  $100\ \text{mM}$  GA4 in EtOH, 0.1 % Silwet L-77 Loveland industries) or mock (0.1 % EtOH, 0.1 % Silwet).  
155 Leaves were harvested 14 days after germination at Zeitgeber time (ZT) 8.

156 All experiments were performed in three independent biological replicates. All samples were  
157 immediately frozen in liquid nitrogen and stored at -80°C.

## 158 RNA extraction and cDNA synthesis

159 The frozen seedling samples were ruptured using a TissueLyser (Qiagen) and total RNA extraction  
160 was carried out with Tri-Reagent (Ambion by Life Technologies). All samples were treated with  
161 DNaseI (Thermo Fisher Scientific). The frozen leaf samples were ruptured using a TissueLyser  
162 (Qiagen), extracted with the RNAeasy Plant Mini Kit (Qiagen) and treated with DNase (Ambion by Life  
163 Technologies). RNA integrity was controlled on a bleach gel (Aranda et al., 2012) and RNA  
164 concentration and purity was measured using a photometer (Eppendorf). cDNA was synthesised  
165 from 500 ng total RNA with oligodT primers, using the RevertAid First Strand cDNA Synthesis Kit  
166 (Thermo Fisher Scientific) according to the provided protocol. The cDNA was tested for DNA  
167 contamination and integrity by PCR and subsequent gel electrophoresis. The cDNA was diluted (1:10,  
168 1:20, 1:40, 1:80, 1:160, and 1:320) to analyse primer efficiency and determine the correlation  
169 coefficient.

## 170 Choice of candidate genes and primer design

171 The eight reference gene candidates *EIF4a*, *ACTIN 2*, *CAC*, *TUA5*, *HISTONE H3*, *HSP81.2/90*, *18srRNA*  
172 and *SAND* were chosen due to their stable expression in other species (12–16). *PSB33*, *ATPase*,  
173 *THIOREDOXIN*, *HCF* and *NdhO* were chosen regarding their robust expression levels in *Arabis* in a  
174 time-course RNAseq experiment (data provided by Eva Willing, MPIPZ, Cologne) and/or due to their  
175 essential function for the plant. The *RAN3* primers were taken from Wang et al., 2009. *UBQ10*  
176 primers were kindly provided by Pan Pan Jiang.

177 Sequences were taken from TAIR (17), NCBI (National Centre for Biotechnology Information,  
178 [www.ncbi.nlm.nih.gov](http://www.ncbi.nlm.nih.gov)) and the Genomic resources for *Arabis alpina* website ([www.arabis-alpina.org](http://www.arabis-alpina.org);  
179 Willing et al., 2015). *In silico* sequence analysis was carried out with CLC DNA Workbench version  
180 5.6.1. The primers were designed using GenScript Real-time PCR Primer Design ([www.genscript.com](http://www.genscript.com))

181 at an optimum  $T_m$  of  $60 \pm 2^\circ\text{C}$ . Amplicons showed a single band of the expected size in gel  
182 electrophoresis and a single peak in the melting curve (Fig S1). The PCR products were sequenced by  
183 GATC/ Eurofins Genomics to verify specific amplification.

## 184 Quantitative real-time PCR (qPCR)

185 qPCRs were carried out in a QuantStudio 5 System (ABI/Life Technologies) equipped with the  
186 QuantStudio TM Design and Analysis Software version 1.4.1. The qPCRs were performed using plates  
187 (96 well, 0.2 ml) and cover foil (Opti-Seal Optical Disposable Adhesive) from BIOplastics. Reaction  
188 mixtures of 20  $\mu\text{l}$  were composed from 5  $\mu\text{l}$  SYBR Green (Thermo Fisher Scientific), 0.2  $\mu\text{l}$  of each  
189 primer, 1  $\mu\text{l}$  cDNA and 1  $\mu\text{l}$  ddH<sub>2</sub>O. Amplification was carried out with the standard settings of the  
190 QuantStudio 5 System (50°C for 2 min, 95°C for 10 sec, 40 cycles at 95°C for 15 sec and 60°C for 1  
191 min, followed by 95°C for 15 sec and a final dissociation curve from 60°C to 95°C). For each reference  
192 gene sample, three biological and three technical replicates were analysed. The impact of  
193 normalisation on stress/hormone responsive genes was analysed for three technical replicates of one  
194 biological replicate.

## 195 Analysis of qPCR data

196 Efficiency calculations were carried out manually using Excel 2007. Extreme outliers were removed  
197 manually, a standard deviation of technical replicates was accepted below 0.5 Cq. Efficiency of  
198 primers was calculated in cDNA dilution series. The average Cq values ( $y$ ) and log<sub>10</sub> values of the  
199 dilutions ( $x$ ) were used to calculate the slope of a regression line with the formula  $slope =$

200  $\frac{\sum(x - \bar{x})(y - \bar{y})}{\sum(x - \bar{x})^2}$ . The slope was then used to calculate the efficiency of the primers  $E[\%] = 100 \times$

201  $(10^{(-\frac{1}{slope})} - 1)$ . The correlation  $R^2$  of the values was calculated using the formula  $\rho_{x,y} = \frac{Cov(X,Y)}{\sigma_x \times \sigma_y}$ .

202 Primers for reference genes were accepted with an efficiency of 90-110 % and a correlation between  
203 -1 and -0.99. Primers for genes of interest were accepted with an efficiency of 80-120 % and a  
204 correlation between -1 and -0.99.

205 The stability of the reference genes within a given set of different treatments was calculated from  
206 the efficiency corrected data using the algorithms NormFinder (7), BestKeeper (8) and geNorm (9).  
207 The geNorm algorithm was also used to define the number of reference genes necessary for  
208 normalisation.

209 Normalisation against one reference gene was carried out using the normalisation factor,  
210 normalisation against two reference genes was carried out using the geometric mean of the  
211 normalisation factors, according to the geNorm manual (9). In accordance with this manual, standard  
212 deviations between biological replicates were calculated over the means of the single replicates,  
213 rather than the raw data.

## 214 Discussion

215 Gene expression analysis by qPCR is a high-throughput method, which is considered to be very  
216 sensitive and reproducible. However, the accuracy of the results strongly depends on the  
217 experimental design, adequate normalisation and exact analysis of the produced data (18).  
218 Moreover, the qPCR primers must be specific, efficient, and - in the case of reference genes - stable  
219 in the tested conditions (18). In this study, we analysed primers for one established reference gene  
220 (*RAN3*; Wang et al., 2009) and 14 novel reference genes for *Arabis alpina* in several abiotic stress and  
221 hormone treatments. *EIF4a*, *ACTIN 2*, *CAC*, *TUA5*, *HISTONE H3*, *HSP81.2/90* and *SAND* were chosen  
222 because they were already established as reference genes in other species (12–16,19,20). In  
223 addition, we considered *PSB33*, *ATPase*, *THIOREDOXIN*, *HCF* and *NdhO*. The reference genes selected  
224 here are involved in various basic cellular functions including translation, proton transport,  
225 photosynthesis, protein degradation and cytoskeletal organisation. Our data suggest that all genes  
226 reported here are appropriate reference genes for the used tissues under non-stress conditions. As  
227 *PSB33* and *HCF* are functionally related to photosynthesis, they may be more appropriate for  
228 photosynthetic tissues.

229 The reference gene primers presented here have efficiency values between 96.42 and 107.01 %.  
230 Although these are very good efficiencies, it is essential to correct the qPCR results with these values  
231 because of the non-linearity of the PCR amplification steps (21). Consequently, we used efficiency-  
232 corrected data for identifying the most stable reference genes and for the analysis of the impact on  
233 normalisation. There is currently no consensus in the community, which of the three statistical  
234 algorithms – geNorm, NormFinder or BestKeeper – is most appropriate. One advantage of the  
235 geNorm algorithm is that it can be used for small sample sizes (22). However, the geNorm method is  
236 biased towards genes that are co-regulated (23). The algorithm takes into consideration, whether  
237 genes show a similar expression pattern (24), since it is assumed that similar changes in the  
238 expression of two independent genes reflect technical differences, such as the cDNA concentration,  
239 rather than changes caused by a treatment. By contrast, NormFinder considers variations across  
240 subgroups (7). The algorithm assumes that there is no systematic variation of the average of the  
241 tested samples, which can lead to a preference for reference genes with similar systematic variation  
242 (23). BestKeeper takes the standard deviation of each individual reference gene into account, which  
243 is an advantage over the other methods. The disadvantage of this algorithm is the use of a  
244 parametric method (Pearson correlation), which requires normally distributed data with a  
245 homogenous variance (8), which is not always the case. Additionally, BestKeeper uses the raw Cq  
246 values, while geNorm and Normfinder require normalised quantities. Therefore, the results obtained  
247 with BestKeeper are often different from those of the other two methods.

248 It is generally recommended to use more than one reference gene to guarantee optimal  
249 normalisation (18). Our data support this view. The normalised fold change values varied up to  
250 28.9 % between two references. Moreover, we recommend that at least one of the reference gene  
251 amplicons contains introns at the genomic level to recognize potential contaminations with genomic  
252 DNA.

253 For cold treatments, we recommend *RAN3*, as the amplicon contains an intron, combined with *HCF*  
254 or *PSB33*. As *HCF* and *PSB33* are photosynthesis-associated proteins located in the thylakoid



255 membrane, there is no obvious reason to prefer one over the other. For drought treatments, *UBQ10*  
256 and *TUA5* were the most stable transcripts, with *TUA5* also containing an intron. In heat, *RAN3* can  
257 be recommended in combination with *PSB33* or *EIF4a*. As setups for heat treatments often go along  
258 with specific light settings, it might be advisable to use *EIF4a* as a second reference here. For the salt  
259 treatment, we found that *CAC*, *TUA5* and *ACTIN 2* are suitable, intron containing reference genes,  
260 which can be combined with each other or *PSB33*. The combination *TUA5* and *PSB33* might be the  
261 most efficient choice, as it is also the best option for GA treatments.

262 We found that there is no single reference gene, which is the best choice for all treatments.  
263 However, all genes tested in this study, except for *HSP81.2/90* under heat conditions, meet the  
264 requirements necessary for adequate normalisation. Thus, this study provides data for the selection  
265 of suitable reference gene combinations for *Arabidopsis thaliana* in cold, drought, heat, salt and GA  
266 treatments. With this, we enable adequate normalisation in qPCR experiments under these  
267 conditions and provide novel reference genes for future experiments addressing other stresses or  
268 stimuli.

## 269 Acknowledgements

270 We thank Pan Pan Jiang and Eva Willing for providing us with primer sequences and expression data,  
271 respectively. We also thank Jessica Pietsch and Tamara Gigolashvili for critically reading the  
272 manuscript.

## 273 References

- 274 1. Wang R, Farrona S, Vincent C, Joecker A, Schoof H, Turck F, et al. PEP1 regulates perennial  
275 flowering in *Arabis alpina*. *Nature* [Internet]. 2009 May 15 [cited 2018 May 7];459(7245):423–  
276 7. Available from: <http://www.ncbi.nlm.nih.gov/pubmed/19369938>
- 277 2. Willing E-M, Rawat V, Mandáková T, Maumus F, James GV, Nordström KJV, et al. Genome  
278 expansion of *Arabis alpina* linked with retrotransposition and reduced symmetric DNA  
279 methylation. *Nat Plants* [Internet]. Nature Publishing Group; 2015 Feb 2 [cited 2018 Dec  
280 3];1(2):14023. Available from: <http://www.nature.com/articles/nplants201423>
- 281 3. Meusel H, JÄGER EJ, WEINERT E. *Vergleichende Chorologie der Zentraleuropäischen Flora*.  
282 Jena, Germany: Fischer Verlag; 1965.
- 283 4. Koch MA, KIEFER C, EHRICH D, VOGEL J, BROCHMANN C, MUMMENHOFF K. Three times out  
284 of Asia Minor: the phylogeography of *Arabis alpina* L. (Brassicaceae). *Mol Ecol* [Internet].  
285 Wiley/Blackwell (10.1111); 2006 Feb 23 [cited 2018 Jul 30];15(3):825–39. Available from:  
286 <http://doi.wiley.com/10.1111/j.1365-294X.2005.02848.x>
- 287 5. Beilstein MA, Nagalingum NS, Clements MD, Manchester SR, Mathews S. Dated molecular  
288 phylogenies indicate a Miocene origin for *Arabidopsis thaliana*. *Proc Natl Acad Sci U S A*  
289 [Internet]. 2010 Oct 26 [cited 2017 Apr 30];107(43):18724–8. Available from:  
290 <http://www.pnas.org/cgi/doi/10.1073/pnas.0909766107>
- 291 6. Chopra D, Wolff H, Span J, Schellmann S, Coupland G, Albani MC, et al. Analysis of TTG1  
292 function in *Arabis alpina*. *BMC Plant Biol* [Internet]. BioMed Central; 2014 [cited 2016 Aug  
293 3];14(1):16. Available from: [http://bmcplantbiol.biomedcentral.com/articles/10.1186/1471-  
294 2229-14-16](http://bmcplantbiol.biomedcentral.com/articles/10.1186/1471-2229-14-16)
- 295 7. Andersen CL, Jensen JL, Ørntoft TF. Normalization of real-time quantitative reverse  
296 transcription-PCR data: a model-based variance estimation approach to identify genes suited

- 297 for normalization, applied to bladder and colon cancer data sets. *Cancer Res* [Internet]. 2004  
298 Aug 1 [cited 2018 May 6];64(15):5245–50. Available from:  
299 <http://cancerres.aacrjournals.org/lookup/doi/10.1158/0008-5472.CAN-04-0496>
- 300 8. Pfaffl MW, Tichopad A, Prgomet C, Neuvians TP. Determination of stable housekeeping genes,  
301 differentially regulated target genes and sample integrity: BestKeeper – Excel-based tool using  
302 pair-wise correlations. *Biotechnol Lett* [Internet]. Kluwer Academic Publishers; 2004 Mar  
303 [cited 2018 May 6];26(6):509–15. Available from:  
304 <http://link.springer.com/10.1023/B:BILE.0000019559.84305.47>
- 305 9. Vandesompele J, De Preter K, Pattyn F, Poppe B, Van Roy N, De Paepe A, et al. Accurate  
306 normalization of real-time quantitative RT-PCR data by geometric averaging of multiple  
307 internal control genes. *Genome Biol* [Internet]. BioMed Central; 2002 Jun 18 [cited 2018 May  
308 6];3(7):research0034.1. Available from:  
309 <http://genomebiology.biomedcentral.com/articles/10.1186/gb-2002-3-7-research0034>
- 310 10. Murashige T, Skoog F. A Revised Medium for Rapid Growth and Bio Assays with Tobacco  
311 Tissue Cultures. *Physiol Plant* [Internet]. Wiley/Blackwell (10.1111); 1962 Jul 1 [cited 2018  
312 May 6];15(3):473–97. Available from: [http://doi.wiley.com/10.1111/j.1399-](http://doi.wiley.com/10.1111/j.1399-3054.1962.tb08052.x)  
313 [3054.1962.tb08052.x](http://doi.wiley.com/10.1111/j.1399-3054.1962.tb08052.x)
- 314 11. Aranda PS, LaJoie DM, Jorcyk CL. Bleach gel: a simple agarose gel for analyzing RNA quality.  
315 *Electrophoresis* [Internet]. NIH Public Access; 2012 Jan [cited 2018 Aug 2];33(2):366–9.  
316 Available from: <http://www.ncbi.nlm.nih.gov/pubmed/22222980>
- 317 12. Tian C, Jiang Q, Wang F, Wang G-L, Xu Z-S, Xiong A-S. Selection of Suitable Reference Genes  
318 for qPCR Normalization under Abiotic Stresses and Hormone Stimuli in Carrot Leaves. Jain M,  
319 editor. *PLoS One* [Internet]. Public Library of Science; 2015 Feb 6 [cited 2017 Mar  
320 2];10(2):e0117569. Available from: <http://dx.plos.org/10.1371/journal.pone.0117569>
- 321 13. Wang H, Wang J, Jiang J, Chen S, Guan Z, Liao Y, et al. Reference genes for normalizing

- 322 transcription in diploid and tetraploid Arabidopsis. Sci Rep [Internet]. Nature Publishing  
323 Group; 2015 May 27 [cited 2018 Aug 2];4(1):6781. Available from:  
324 <http://www.nature.com/articles/srep06781>
- 325 14. Demidenko N V., Logacheva MD, Penin AA. Selection and Validation of Reference Genes for  
326 Quantitative Real-Time PCR in Buckwheat (*Fagopyrum esculentum*) Based on Transcriptome  
327 Sequence Data. Mariño-Ramírez L, editor. PLoS One [Internet]. Public Library of Science; 2011  
328 May 12 [cited 2018 Aug 2];6(5):e19434. Available from:  
329 <http://dx.plos.org/10.1371/journal.pone.0019434>
- 330 15. Czechowski T, Stitt M, Altmann T, Udvardi MK, Scheible W-R. Genome-wide identification and  
331 testing of superior reference genes for transcript normalization in Arabidopsis. Plant Physiol  
332 [Internet]. American Society of Plant Biologists; 2005 Sep [cited 2017 Jun 9];139(1):5–17.  
333 Available from: <http://www.ncbi.nlm.nih.gov/pubmed/16166256>
- 334 16. Wan Q, Chen S, Shan Z, Yang Z, Chen L, Zhang C, et al. Stability evaluation of reference genes  
335 for gene expression analysis by RT-qPCR in soybean under different conditions. Li X, editor.  
336 PLoS One [Internet]. 2017 Dec 13 [cited 2018 Nov 28];12(12):e0189405. Available from:  
337 <http://www.ncbi.nlm.nih.gov/pubmed/29236756>
- 338 17. Berardini TZ, Reiser L, Li D, Mezheritsky Y, Muller R, Strait E, et al. The arabidopsis information  
339 resource: Making and mining the “gold standard” annotated reference plant genome. *genus*  
340 [Internet]. 2015 Aug 1 [cited 2018 Jan 25];53(8):474–85. Available from:  
341 <http://doi.wiley.com/10.1002/dvg.22877>
- 342 18. Bustin SA, Benes V, Garson JA, Hellemans J, Huggett J, Kubista M, et al. The MIQE Guidelines:  
343 Minimum Information for Publication of Quantitative Real-Time PCR Experiments. Clin Chem  
344 [Internet]. 2009 [cited 2017 Aug 29];55(4). Available from:  
345 <http://clinchem.aaccjnl.org/content/55/4/611/tab-figures-data>
- 346 19. Wu J, Zhang H, Liu L, Li W, Wei Y, Shi S. Validation of Reference Genes for RT-qPCR Studies of

- 347 Gene Expression in Preharvest and Postharvest Longan Fruits under Different Experimental  
348 Conditions. *Front Plant Sci* [Internet]. 2016 Jun 3 [cited 2018 Nov 28];7:780. Available from:  
349 <http://www.ncbi.nlm.nih.gov/pubmed/27375640>
- 350 20. Najafpanah MJ, Sadeghi M, Bakhtiarizadeh MR. Reference Genes Selection for Quantitative  
351 Real-Time PCR Using RankAggreg Method in Different Tissues of *Capra hircus*. Niemann H,  
352 editor. *PLoS One* [Internet]. 2013 Dec 16 [cited 2018 Nov 28];8(12):e83041. Available from:  
353 <http://www.ncbi.nlm.nih.gov/pubmed/24358246>
- 354 21. Ruijter JM, Ramakers C, Hoogaars WMH, Karlen Y, Bakker O, van den Hoff MJB, et al.  
355 Amplification efficiency: linking baseline and bias in the analysis of quantitative PCR data.  
356 *Nucleic Acids Res* [Internet]. 2009 Apr 1 [cited 2018 Dec 13];37(6):e45–e45. Available from:  
357 <http://www.ncbi.nlm.nih.gov/pubmed/19237396>
- 358 22. Serrano M, Moreno-Sánchez N, González C, Marcos-Carcavilla A, Van Poucke M, Calvo JH, et  
359 al. Use of Maximum Likelihood-Mixed Models to select stable reference genes: a case of heat  
360 stress response in sheep. *BMC Mol Biol* [Internet]. 2011 Aug 17 [cited 2018 Dec 9];12(1):36.  
361 Available from: <http://bmcmolbiol.biomedcentral.com/articles/10.1186/1471-2199-12-36>
- 362 23. Mehdi Khanlou K, Van Bockstaele E. A critique of widely used normalization software tools  
363 and an alternative method to identify reliable reference genes in red clover (*Trifolium*  
364 *pratense* L.). *Planta* [Internet]. 2012 Nov 21 [cited 2018 Dec 9];236(5):1381–93. Available  
365 from: <http://www.ncbi.nlm.nih.gov/pubmed/22718310>
- 366 24. Vandesompele J, De Preter K, Pattyn F, Poppe B, Van Roy N, De Paepe A, et al. Accurate  
367 normalization of real-time quantitative RT-PCR data by geometric averaging of multiple  
368 internal control genes. *Genome Biol* [Internet]. *BioMed Central*; 2002 Jun 18 [cited 2018 Apr  
369 19];3(7):RESEARCH0034. Available from: <http://www.ncbi.nlm.nih.gov/pubmed/12184808>
- 370

## 371 Supplementary Materials

372 **Table S1. Raw Cq values of treatments with cold, drought, heat, salt and gibberellic acid.**

373 **Fig S1. Melting curves of candidate reference genes and stress/hormone responsive genes.**

374 **Fig S2. Standard curves of candidate reference genes and stress/hormone responsive genes.**

375 **Table S2. Ranking of gene expression stability under abiotic stress conditions and the combination of all**  
376 **treatments.** Genes were ranked using the three commonly used statistical algorithms NormFinder, BestKeeper  
377 and geNorm. The stability value describes the variance (NormFinder and geNorm) or standard deviation  
378 (BestKeeper).

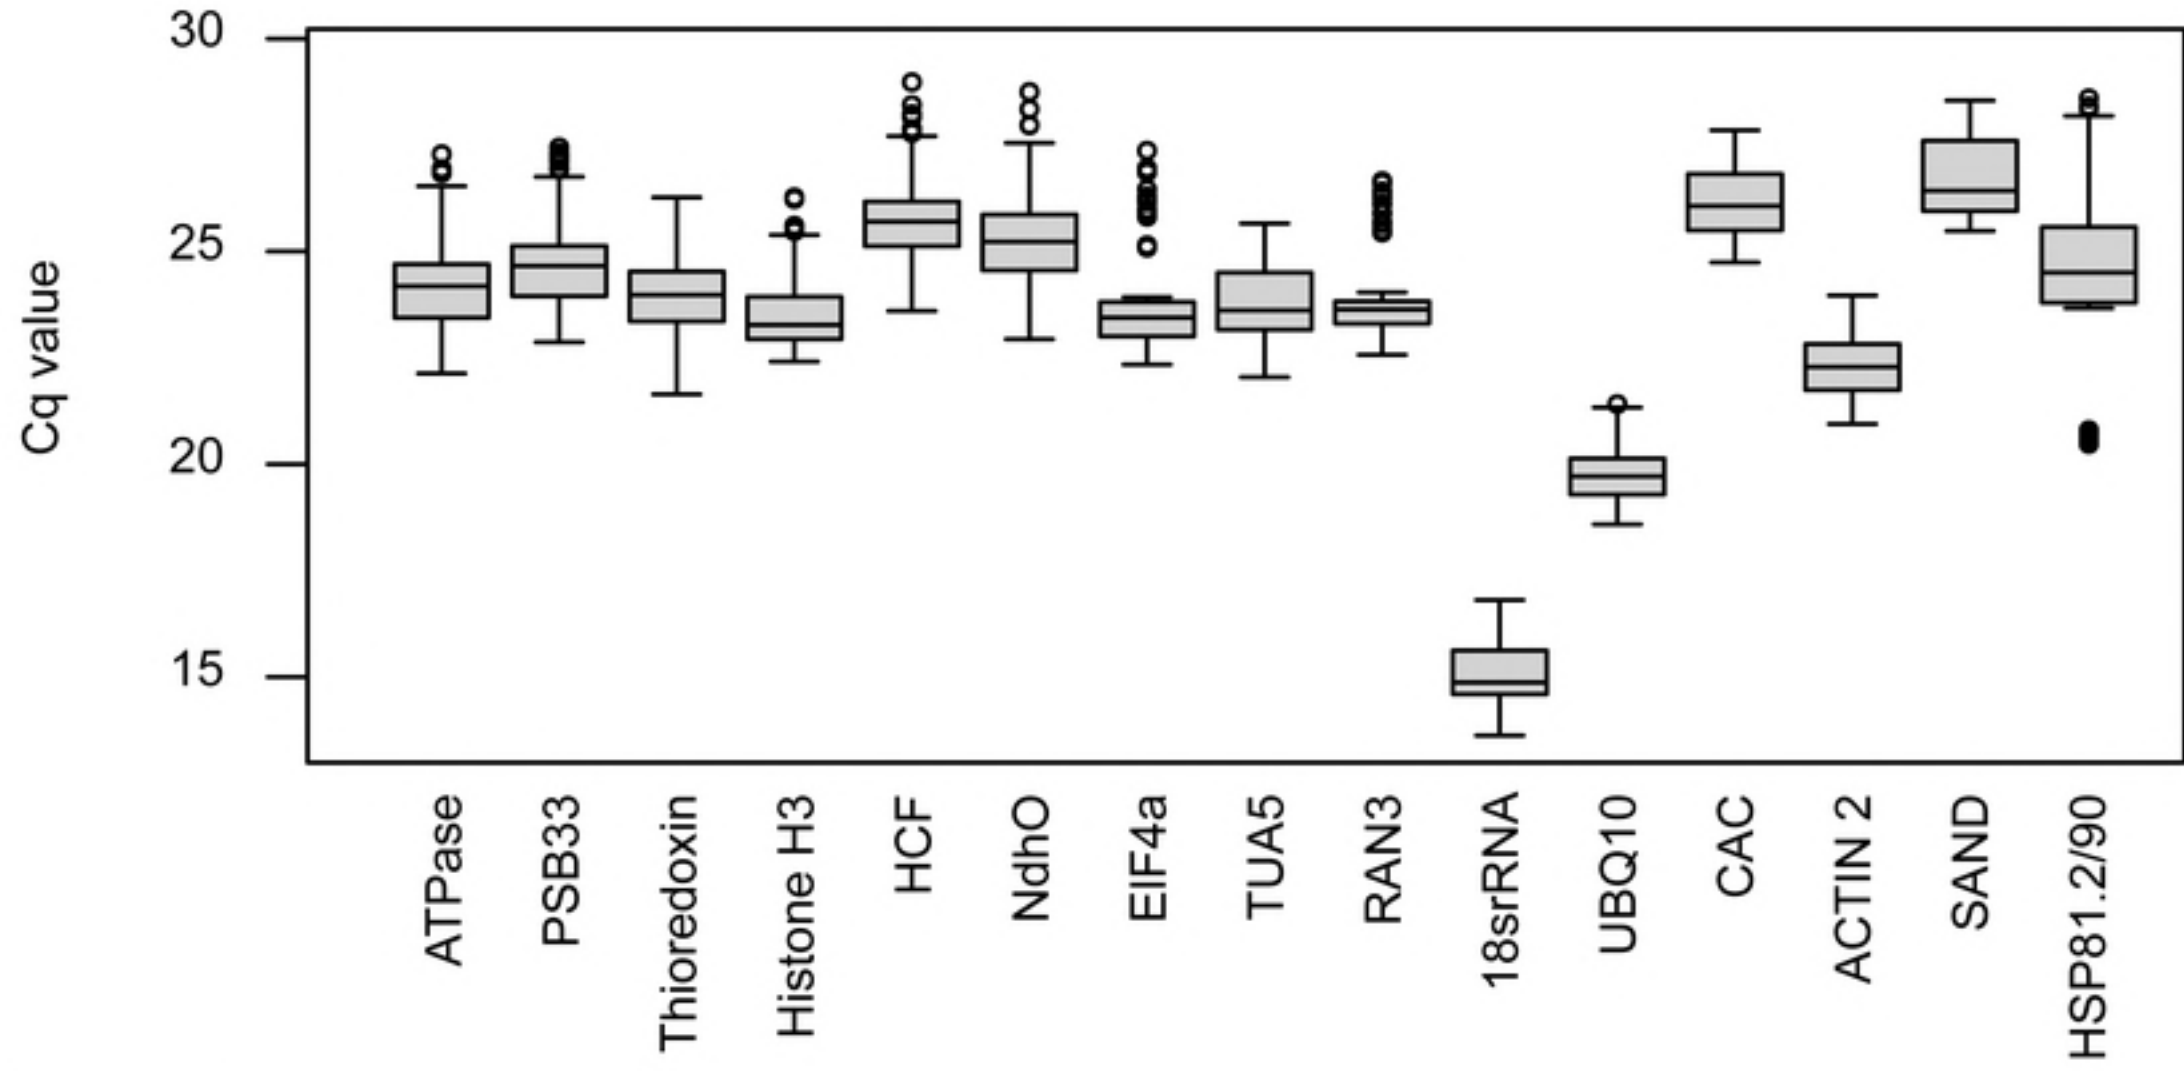

Figure 1

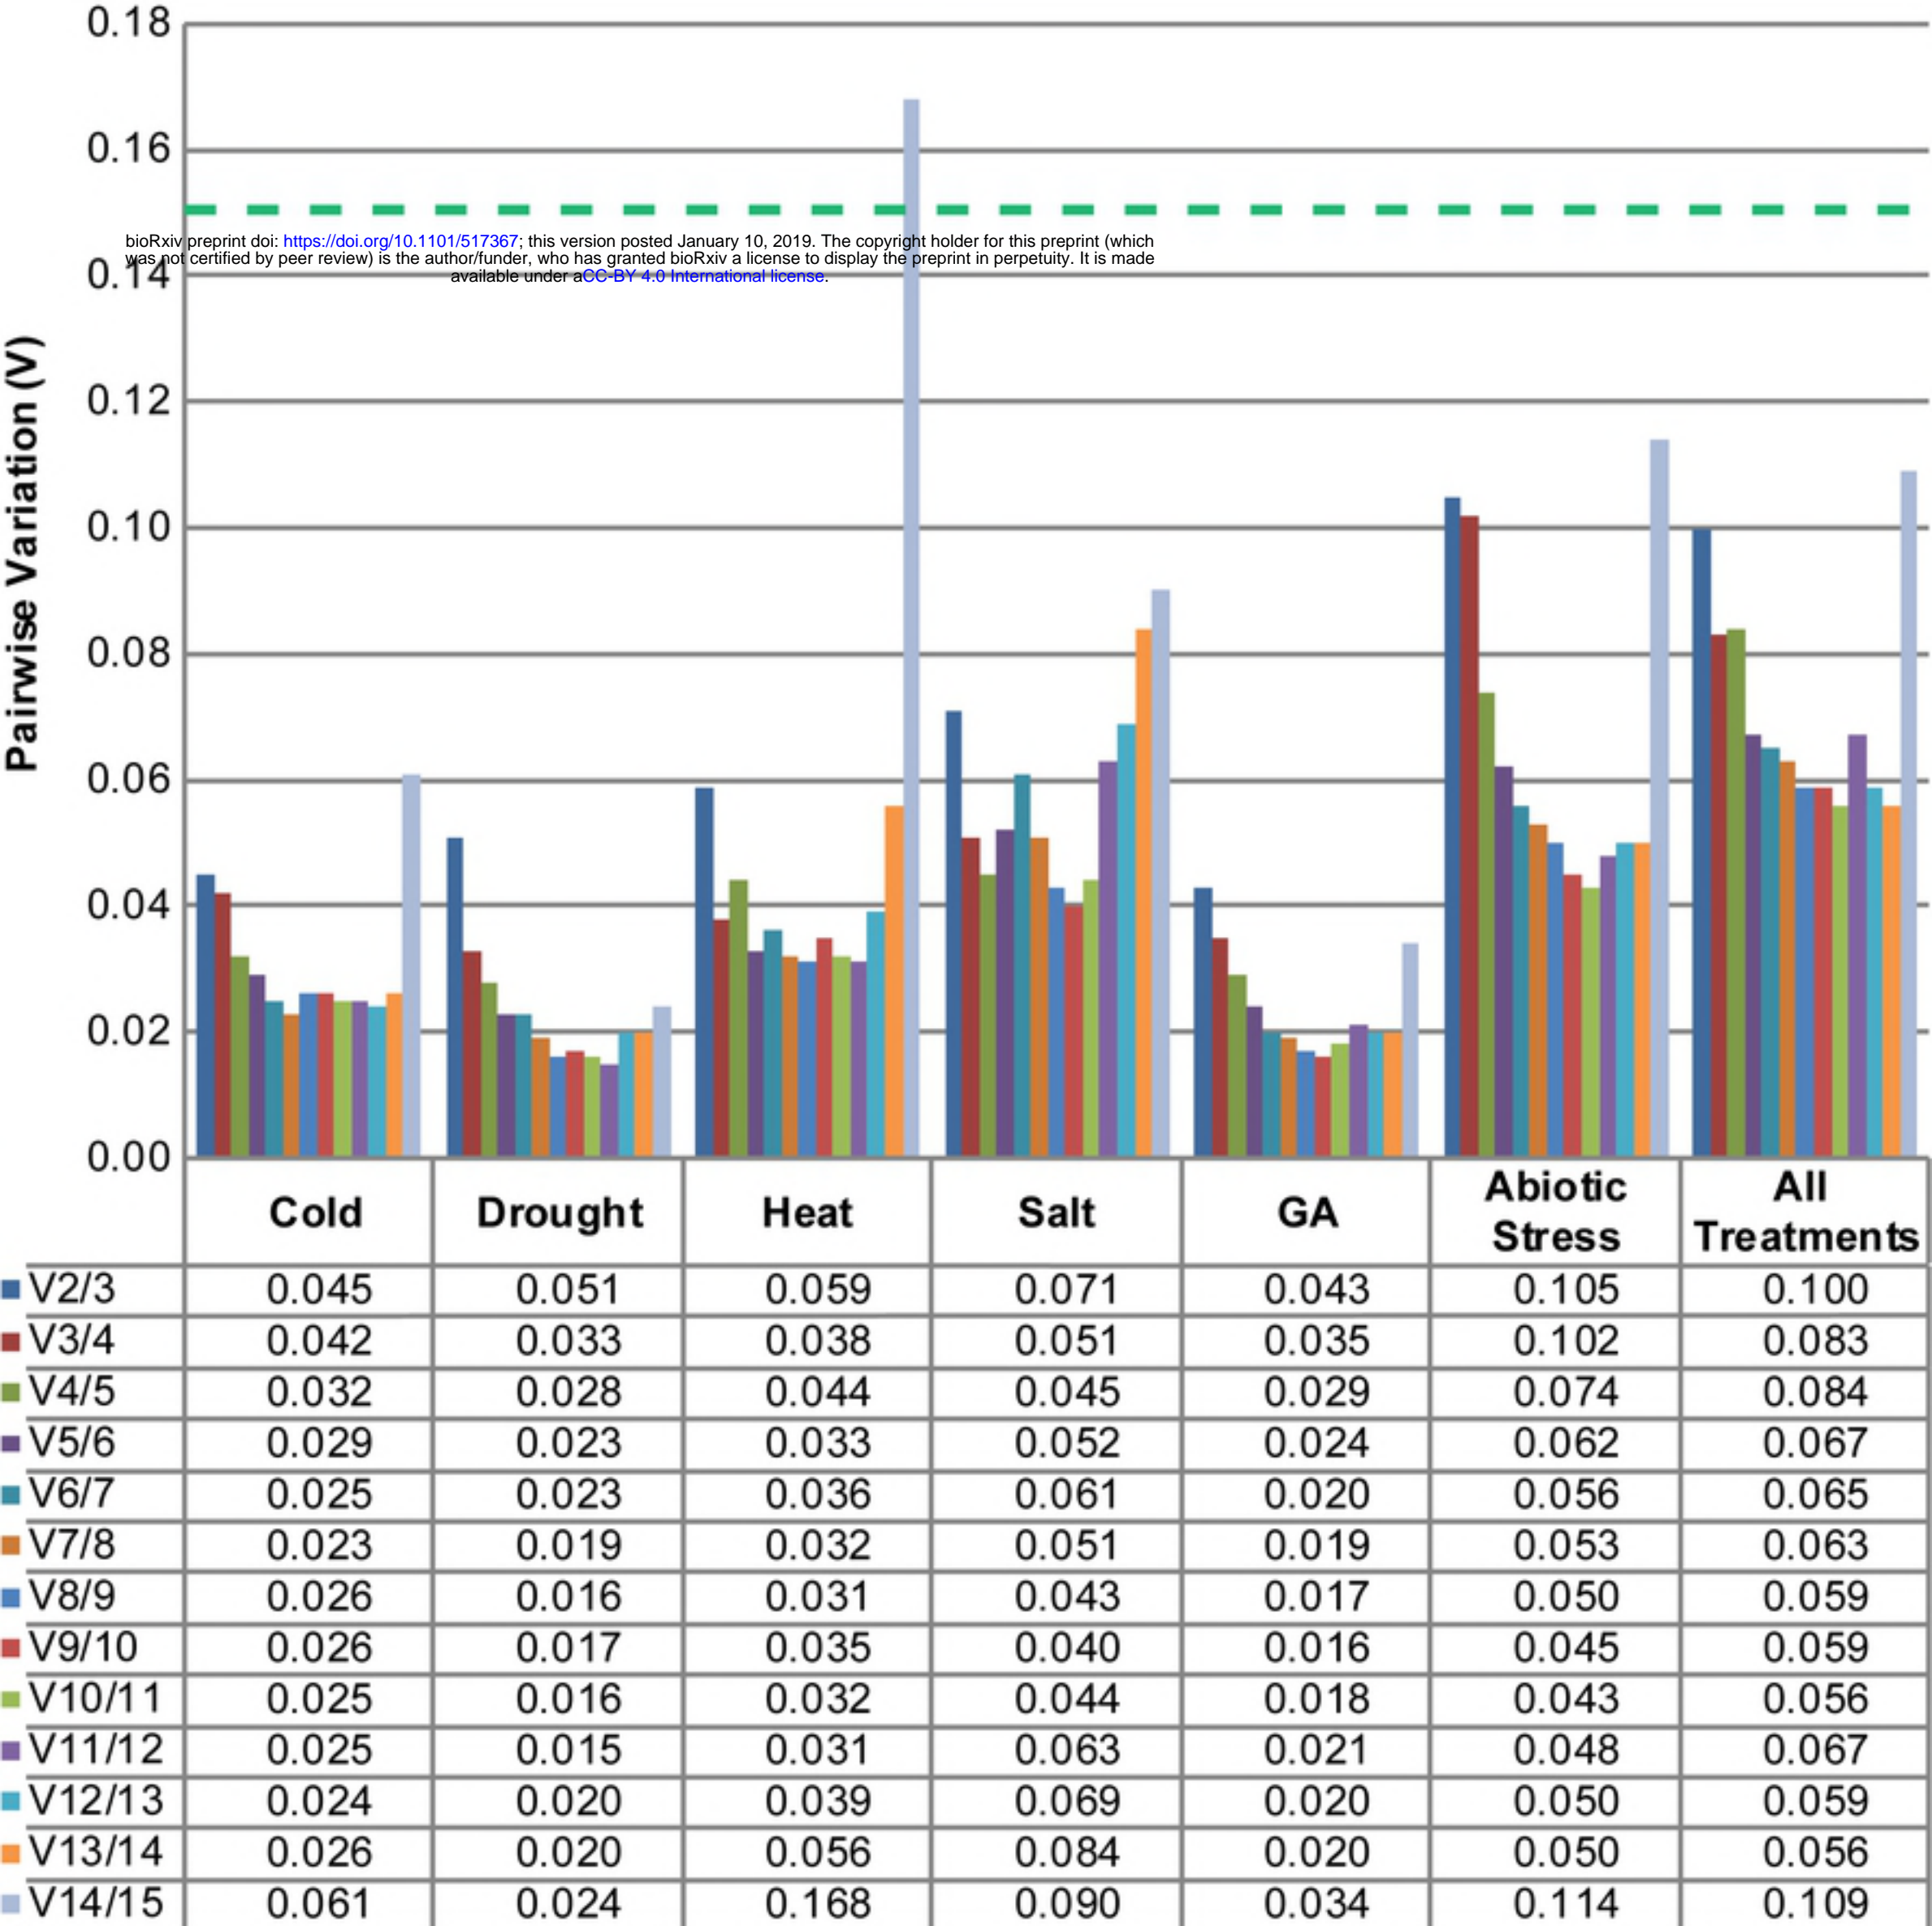

Figure 2



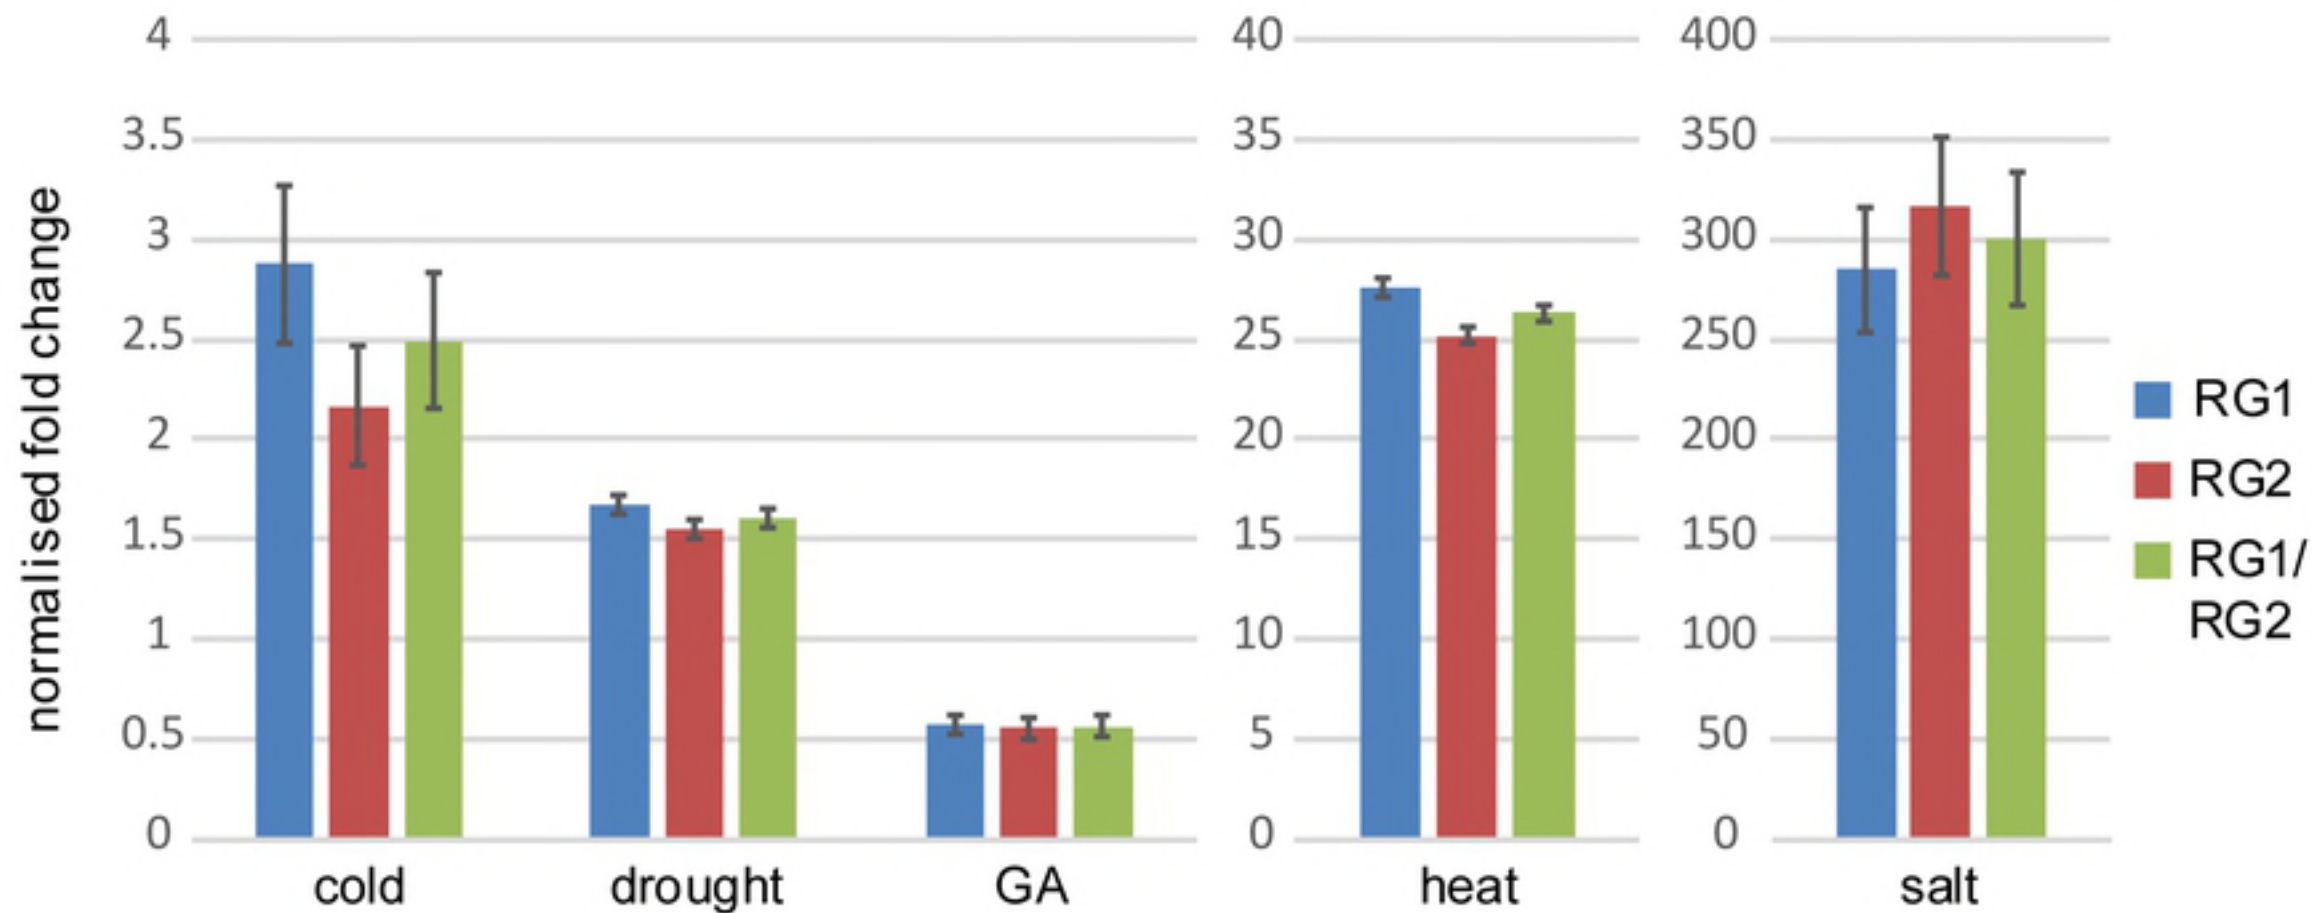

|         |      |      |      |       |        |
|---------|------|------|------|-------|--------|
| RG1     | 2.88 | 1.67 | 0.57 | 27.61 | 285.31 |
| RG2     | 2.16 | 1.55 | 0.55 | 25.17 | 316.58 |
| RG1/RG2 | 2.49 | 1.61 | 0.56 | 26.36 | 300.53 |

Figure 3
